# Supplementary material for: Preparation of citric acid/porous starch composite adsorbents and their adsorption studies
Source: Royal Society of Chemistry journal article supplement (doi:10.1039/d3ma00228d), 2023-01-01
Supplement: d3ma00228d1.pdf [file d3ma00228d1.pdf]

## Supporting Information

### Preparation and Application of Citric Acid/Porous Starch Composite Adsorbents

Yangyang Zheng<sup>a#</sup>, Ye He<sup>a#</sup>, Chang Liu<sup>a#</sup>, Leqian Song<sup>a</sup>, Huacheng Zhang<sup>\*a</sup>

<sup>a</sup> School of Chemical Engineering and Technology, Xi'an Jiaotong University, Xi'an, Shaanxi 710049, China. E-mail: zhanghuacheng@xjtu.edu.cn

<sup>#</sup> these authors contributed equally.

## 1. Figures

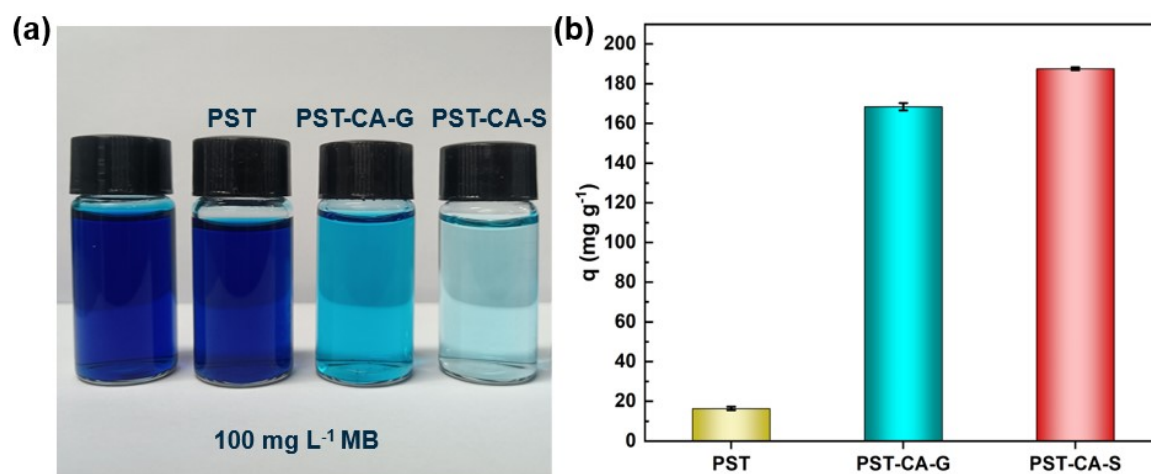

**Fig. S1** Comparison of the adsorption effect of PST-CA obtained by different preparation methods: (a) optical photos before and after adsorption; (b) adsorption capacity.

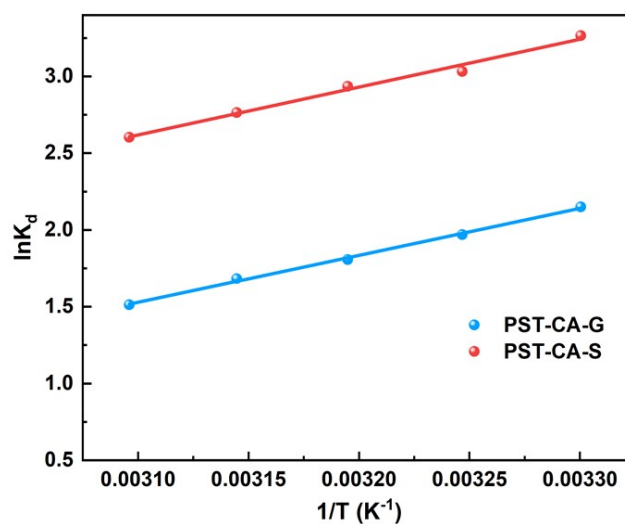

**Fig. S2** Adsorption thermodynamic curves:  $\ln K_d$  versus  $1/T$

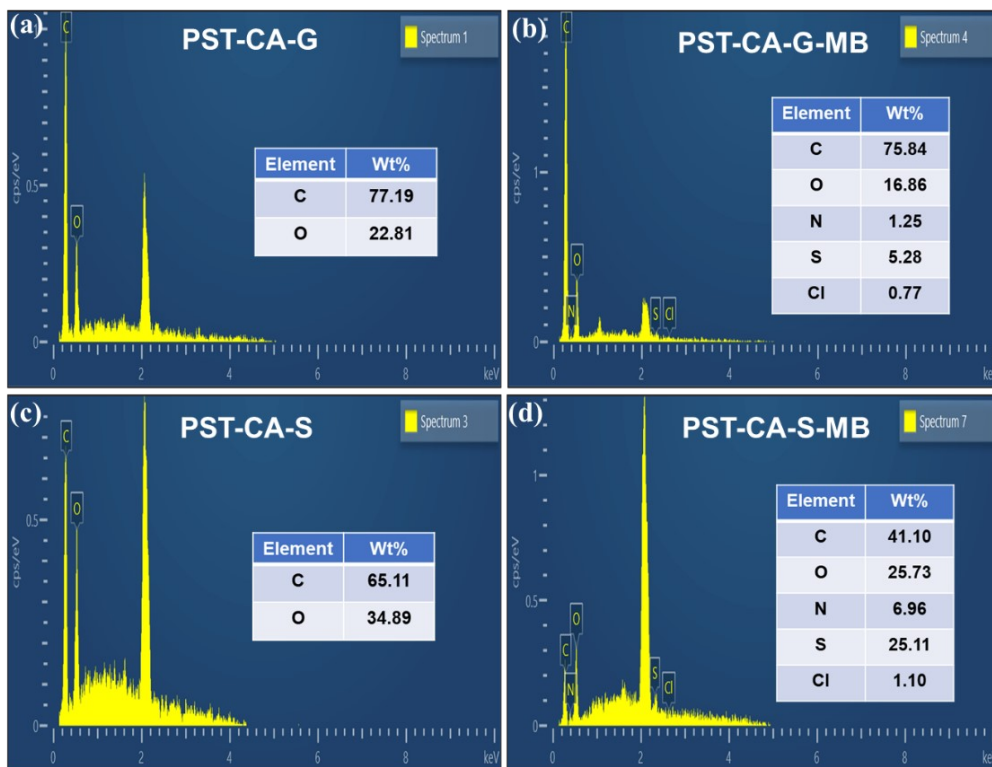

**Fig. S3** EDS plots and corresponding elemental weight percentages of PST-CA-G and PST-CA-S before and after adsorption of MB.

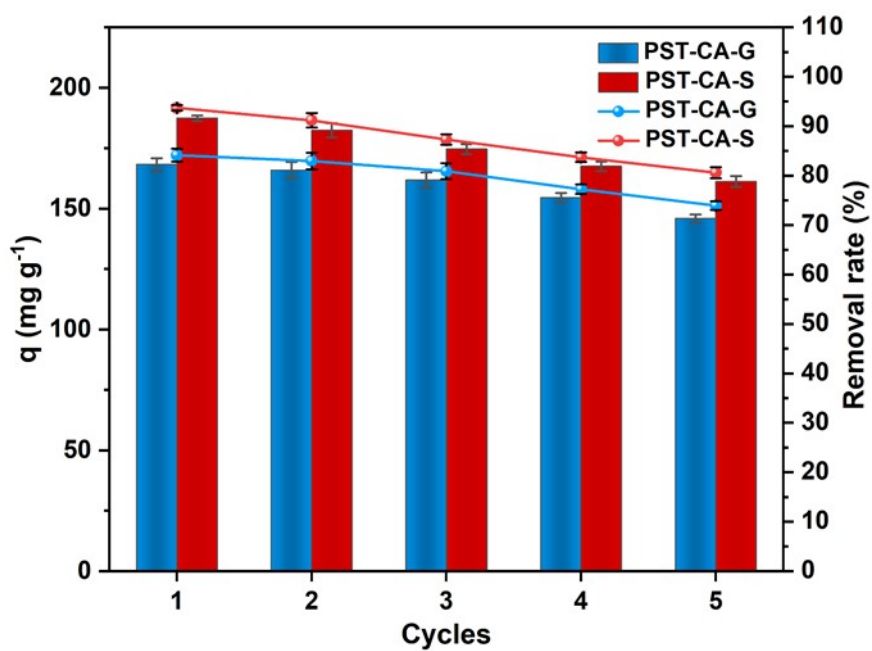

**Fig. S4** Performance of cyclic regeneration

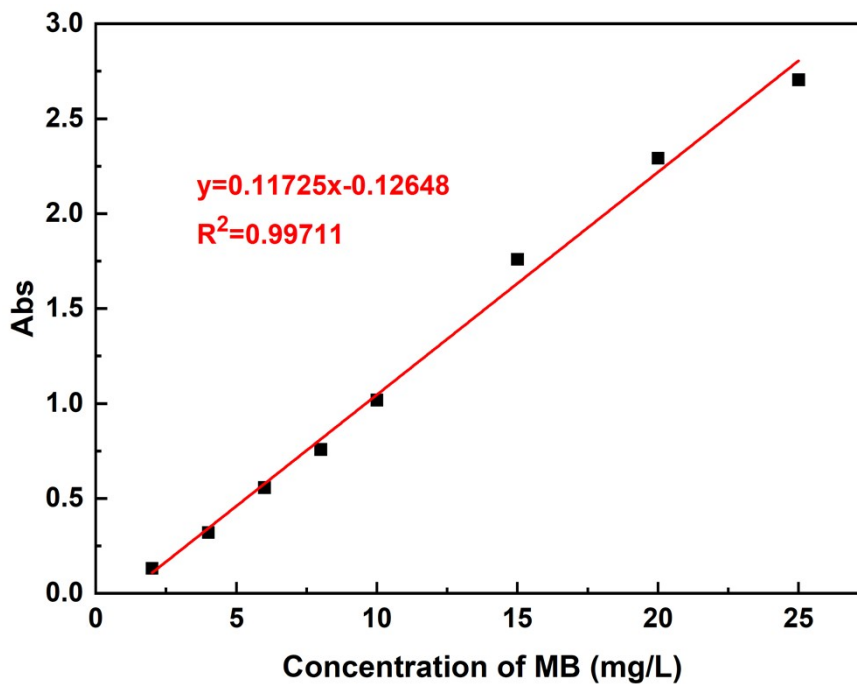

Fig. S5 The standard curve of the MB solute

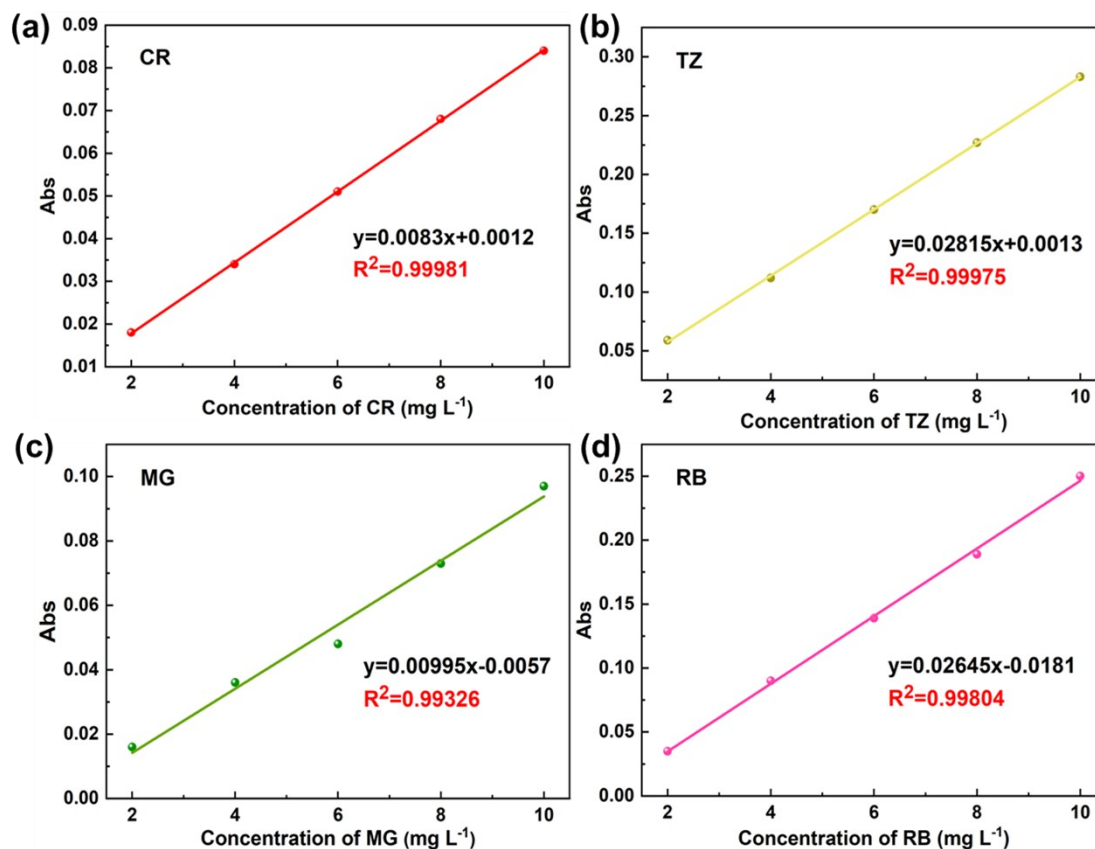

Fig. S5 Standard curve of each dye solution. A series of MB solutions were prepared with a concentration range of 0 to 25.0 mg L<sup>-1</sup> (0, 2.0, 4.0, 6.0, 8.0, 10.0, 15, 20, 25 mg L<sup>-1</sup>). The absorbance at the maximum absorption wavelength (664 nm) was measured,

and the standard curve for the MB was obtained using the MB concentration ( $C$ ,  $\text{mg L}^{-1}$ ) as the x-coordinate and the absorbance ( $A$ ) as the y-coordinate (Fig. S5). The experimental results showed a good linear relationship between absorbance and MB concentration with a linear equation of  $A = -0.12648 + 0.11725 C$  ( $R^2 = 0.99711$ ).

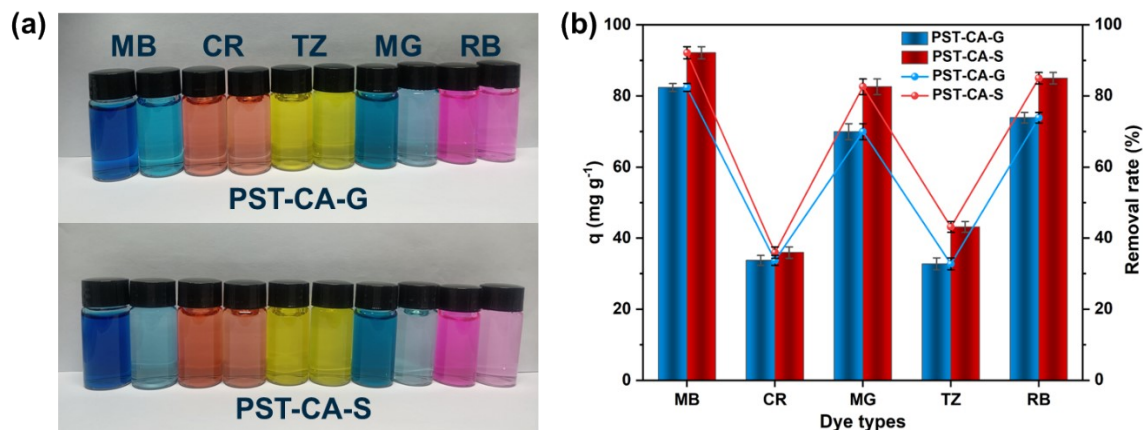

**Fig. S6** PST-CA-G and PST-CA-S versatility test: (a) Experimental effect graph; (b) Comparison of adsorption capacity.

## 2. Tables

**Table S1** Thermodynamically relevant parameters of PST-CA-G and PST-CA-S adsorbed MB.

| Adsorbent | Temperature (K ) | $\Delta G^0$ ( $\text{kJ mol}^{-1}$ ) | $\Delta H^0$ ( $\text{kJ mol}^{-1}$ ) | $\Delta S^0$ ( $\text{J mol}^{-1} \text{K}^{-1}$ ) |
|-----------|------------------|---------------------------------------|---------------------------------------|----------------------------------------------------|
| PST-CA-G  | 303              | -5.3967                               |                                       |                                                    |
|           | 313              | -4.7350                               | -25.4462                              | -66.1701                                           |
|           | 323              | -4.0733                               |                                       |                                                    |
| PST-CA-S  | 303              | -8.1726                               |                                       |                                                    |
|           | 313              | -7.5874                               | -25.9051                              | -58.5321                                           |
|           | 323              | -7.0021                               |                                       |                                                    |
